# Supplementary material for: Psychiatric associations of adult-onset focal dystonia phenotypes
Source: PubMed Central journal article supplement — J Neurol Neurosurg Psychiatry. 2017 Apr 24;88(7):595–602. doi: 10.1136/jnnp-2016-315461 (PMC5659143; doi:10.1136/jnnp-2016-315461), 2017-04-24
Supplement: jnnp-2016-315461supp001.pdf [file jnnp-2016-315461supp001.pdf]

## Appendix 1

Additional Dystonia Coalition Investigators who contributed at least one subject included in this manuscript:

| <b>Name(s)</b>                                               | <b>Affiliation</b>                                                                                                                                              |
|--------------------------------------------------------------|-----------------------------------------------------------------------------------------------------------------------------------------------------------------|
| <b>Ludy Shih, MD, MMSc</b>                                   | Department of Neurology, Beth Israel Deaconess Medical Center, Harvard Medical School, Boston, MA, USA                                                          |
| <b>W. Lawrence Severt, MD, PhD and Susan B. Bressman, MD</b> | Department of Neurology, Mount Sinai Beth Israel Medical Center, New York, NY, USA                                                                              |
| <b>Pinky Agarwal, MD</b>                                     | Booth Gardner Parkinson's Care Center, Evergreen Health, Kirkland, WA, USA                                                                                      |
| <b>Sylvain Chouinard, MD</b>                                 | Département de Neurosciences, Université de Montréal, Montréal, QC, Canada                                                                                      |
| <b>Zoltan Mari, MD</b>                                       | Parkinson's & Movement Disorder Center, Johns Hopkins University, Baltimore, MD, USA                                                                            |
| <b>Mark Hallett, MD</b>                                      | Medical Neurology Branch/Human Motor Control Section, National Institute of Neurological Disorders and Stroke, National Institutes of Health, Bethesda, MD, USA |
| <b>Julie Leegwater-Kim, MD, PhD</b>                          | Department of Neurology, Lahey Clinic, Burlington, MA, USA                                                                                                      |
| <b>Stephen Grill, MD, PhD</b>                                | Parkinson's and Movement Disorders Center of Maryland, Elkridge, MD, USA                                                                                        |
| <b>Daniel Truong, MD</b>                                     | The Parkinson and Movement Disorder Institute, Fountain Valley, CA, USA                                                                                         |
| <b>Cynthia L. Comella, MD</b>                                | Rush University Medical Center, Department of Neurological Sciences, Chicago, IL, USA                                                                           |
| <b>Tanya L. Harlow, MD</b>                                   | Department of Neurology, Sanford Health, Fargo, ND, USA                                                                                                         |
| <b>Susan H Fox, MRCP(UK), PhD</b>                            | Division of Neurology, University of Toronto, ON, Canada                                                                                                        |
| <b>Oksana Suchowersky, MD</b>                                | Department of Neurology, University of Alberta, Edmonton AL, Canada                                                                                             |
| <b>Tao Xie, MD PhD</b>                                       | Department of Neurology, University of Chicago Medical Center, Chicago, IL, USA                                                                                 |
| <b>Ergun Y. Uc, MD</b>                                       | Department of Neurology, University of Iowa Hospitals & Clinics, Iowa City, IA, USA                                                                             |
| <b>Christine Klein, MD</b>                                   | Department of Neurogenetics and Neurology, University of Luebeck, Luebeck, Germany                                                                              |
| <b>Richard L Barbano, MD, PhD</b>                            | Department of Neurology, University of Rochester, Rochester, NY, USA                                                                                            |
| <b>Mark S. LeDoux, MD, PhD</b>                               | Departments of Neurology, and Anatomy and Neurobiology, University of Tennessee Health Science Center, Memphis, TN, USA                                         |
| <b>Stephen G. Reich, MD</b>                                  | University of Maryland, Department of Neurology, University of Maryland School of Medicine, Baltimore,                                                          |

|                                                  |                                                                                                                                      |
|--------------------------------------------------|--------------------------------------------------------------------------------------------------------------------------------------|
|                                                  | MD, USA                                                                                                                              |
| <b>Natividad Stover, MD</b>                      | Department of Neurology, The University of Alabama at Birmingham, Birmingham, AL, USA                                                |
| <b>Fatta B. Nahab, MD</b>                        | Department of Neurosciences, University of California, San Diego Movement Disorder Center, San Diego, CA, USA                        |
| <b>Sarah Pirio Richardson, MD</b>                | Department of Neurology, University of New Mexico Health Sciences Center, Albuquerque, NM, USA                                       |
| <b>Pravin Khemani, MD and Neepa J. Patel, MD</b> | Department of Neurology and Neurotherapeutics, University of Texas Southwestern Medical Center, Dallas, TX, USA                      |
| <b>Claudia M. Testa, MD PhD</b>                  | Department of Neurology, Virginia Commonwealth University, Richmond, VA, USA                                                         |
| <b>Allison Brashear, MD, MBA</b>                 | Neurology, Wake Forest Baptist Medical Center, Winston Salem, NC, USA                                                                |
| <b>Victor SC Fung, PhD, FRACP</b>                | Movement Disorders Unit, Department of Neurology, Westmead Hospital & Sydney Medical School, University of Sydney, Sydney, Australia |
| <b>Alfredo Berardelli, MD</b>                    | Department of Neurology and Psychiatry, Sapienza University of Rome, Rome, Italy                                                     |
